# Supplementary material for: Genome-Wide Identification of Rapid Alkalinization Factor Family in Brassica napus and Functional Analysis of BnRALF10 in Immunity to Sclerotinia sclerotiorum
Source: PubMed Central journal article supplement (PMC9113046; doi:10.3389/fpls.2022.877404), 2022-05-03
Supplement: Image_1.pdf [file Image_1.pdf]

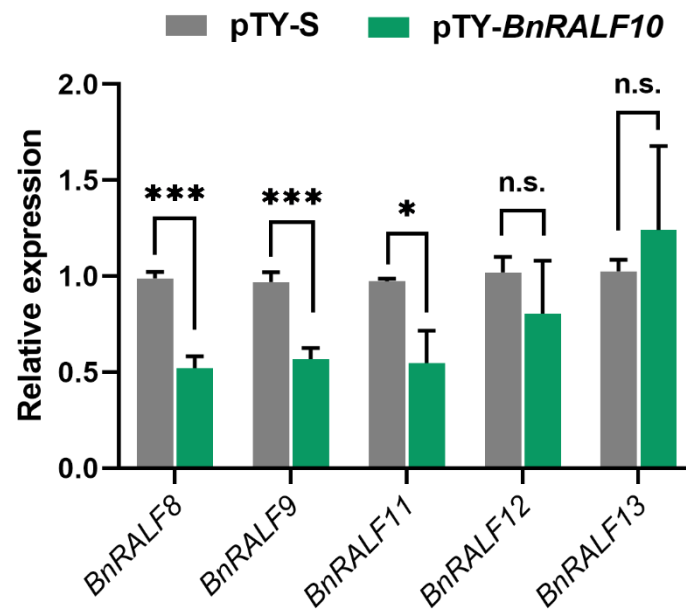

**Figure S1. Expression of *BnRALF10* homologous genes in rape plants VIGS treated with pTY-*BnRALF10*.** Data are statistically analyzed by Student's *t*-test ( $n = 3$ ) and shown as the mean  $\pm$  SE. The asterisks indicate significant differences ( $*P \leq 0.05$ ,  $***P \leq 0.001$ ). n.s., not significant.

**A**

|                                     | Description                                                      | Scientific Name                | Max Score | Total Score | Query Cover | E value | Per. Ident | Acc. Len | Accession                      |
|-------------------------------------|------------------------------------------------------------------|--------------------------------|-----------|-------------|-------------|---------|------------|----------|--------------------------------|
| <input checked="" type="checkbox"/> | hypothetical protein HID58_081986 [Brassica napus]               | <a href="#">Brassica napus</a> | 1582      | 1582        | 100%        | 0.0     | 88.50%     | 1893     | <a href="#">KAH0864775.1</a>   |
| <input checked="" type="checkbox"/> | unnamed protein product [Brassica napus]                         | <a href="#">Brassica napus</a> | 1572      | 1572        | 96%         | 0.0     | 88.82%     | 1994     | <a href="#">CAF2046803.1</a>   |
| <input checked="" type="checkbox"/> | unnamed protein product [Brassica napus]                         | <a href="#">Brassica napus</a> | 1569      | 1569        | 96%         | 0.0     | 88.71%     | 1207     | <a href="#">CAF2111057.1</a>   |
| <input checked="" type="checkbox"/> | unnamed protein product [Brassica napus]                         | <a href="#">Brassica napus</a> | 1568      | 1568        | 96%         | 0.0     | 89.30%     | 893      | <a href="#">CAF2151284.1</a>   |
| <input checked="" type="checkbox"/> | receptor-like protein kinase FERONIA isoform X2 [Brassica napus] | <a href="#">Brassica napus</a> | 1567      | 1567        | 96%         | 0.0     | 89.30%     | 892      | <a href="#">XP_013734398.1</a> |

**B**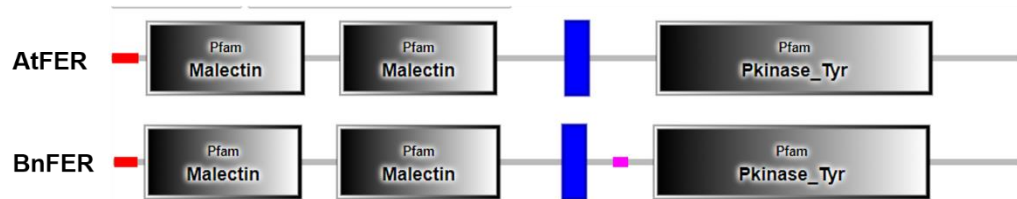

**Figure S2. *B. napus* and *A. thaliana* FERs.** (A) Result of BLASTp search for *B. napus* FER using *A. thaliana* FER as query. Red-boxed (A) is the FER in *B. napus* cultivar Zhongshuang 11. (B) Domain composition of *B. napus* and *A. thaliana* FERs.

## PCA Analysis

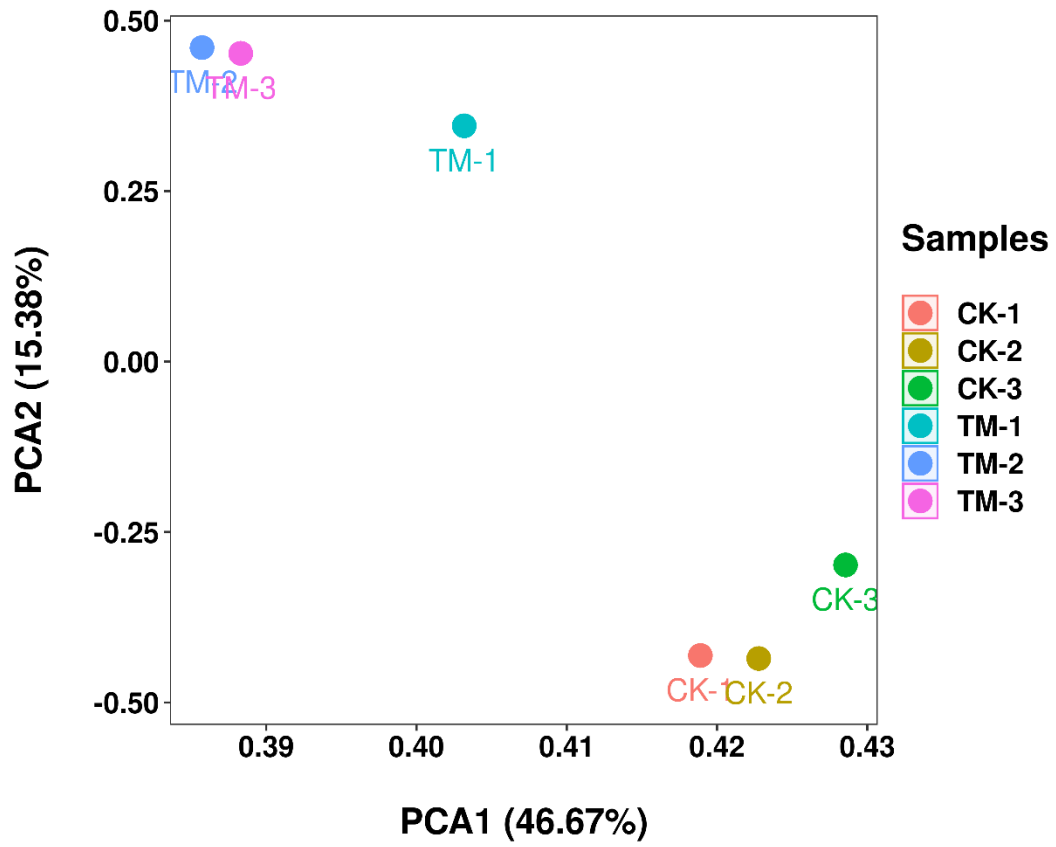

Figure S3. Results of Principal Components Analysis of samples for quantitative proteome analysis. TM: BnRALF10-treated leaves; CK: ddH<sub>2</sub>O-treated leaves.

**A**

| Description                                                                                     | Scientific Name | Max Score | Total Score | Query Cover | E value | Per Ident | Acc. Len | Accession      |
|-------------------------------------------------------------------------------------------------|-----------------|-----------|-------------|-------------|---------|-----------|----------|----------------|
| <input checked="" type="checkbox"/> unnamed protein product [Brassica napus]                    | Brassica napus  | 1723      | 1723        | 100%        | 0.0     | 92.48%    | 1028     | CAF169797.1    |
| <input checked="" type="checkbox"/> subtilisin-like protease SBT6.1 isoform X5 [Brassica napus] | Brassica napus  | 1721      | 1721        | 99%         | 0.0     | 92.57%    | 1048     | XP_013682021.1 |
| <input checked="" type="checkbox"/> subtilisin-like protease SBT6.1 isoform X1 [Brassica napus] | Brassica napus  | 1717      | 1717        | 100%        | 0.0     | 92.17%    | 1023     | XP_013730671.1 |
| <input checked="" type="checkbox"/> subtilisin-like protease SBT6.1 isoform X3 [Brassica napus] | Brassica napus  | 1715      | 1715        | 99%         | 0.0     | 92.47%    | 1047     | XP_022554477.1 |
| <input checked="" type="checkbox"/> hypothetical protein HID58_088891 [Brassica napus]          | Brassica napus  | 1709      | 1709        | 100%        | 0.0     | 91.03%    | 1035     | KAH0931774.1   |
| <input checked="" type="checkbox"/> hypothetical protein HID58_050943 [Brassica napus]          | Brassica napus  | 1703      | 1703        | 100%        | 0.0     | 90.67%    | 1045     | KAH0888514.1   |
| <input checked="" type="checkbox"/> subtilisin-like protease SBT6.1 isoform X2 [Brassica napus] | Brassica napus  | 1381      | 1381        | 79%         | 0.0     | 94.09%    | 804      | XP_022567875.1 |
| <input checked="" type="checkbox"/> hypothetical protein HID58_088669 [Brassica napus]          | Brassica napus  | 243       | 316         | 26%         | 4e-72   | 70.24%    | 326      | KAH0860408.1   |
| <input checked="" type="checkbox"/> unnamed protein product [Brassica napus]                    | Brassica napus  | 216       | 290         | 18%         | 2e-63   | 84.50%    | 248      | CAF1777688.1   |

**B**

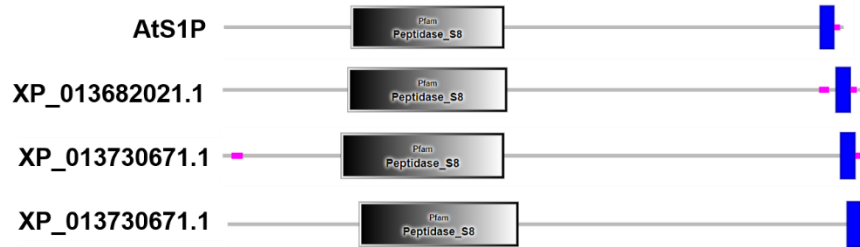

**Figure S4. *B. napus* and *A. thaliana* S1Ps.** (A) Result of BLASTp search for *B. napus* S1Ps using *A. thaliana* S1P as query. Red-boxed (A) is the S1Ps in *B. napus* cultivar Zhongshuang 11. (B) Domain composition of *B. napus* and *A. thaliana* S1Ps.
